# Supplementary material for: Rate dependent structural changes, cycling stability, and Li-ion diffusivity in a layered–layered oxide cathode material after prolonged cycling
Source: Royal Society of Chemistry journal article supplement (doi:10.1039/d1ta02293h), 2021-01-01
Supplement: d1ta02293h1.pdf [file d1ta02293h1.pdf]

Supplementary information for

**Rate Dependent Structural Changes, Cycling Stability, and Li-Ion Diffusivity in a Layered-Layered Oxide Cathode Material after Prolonged Cycling**

Songyoot Kaewmala<sup>a</sup>, Wanwisa Limphirat<sup>b</sup>, Visittapong Yordsri<sup>c</sup>, Jeffrey Nash<sup>d</sup>, Sutham Srilomsak<sup>a,f</sup>,  
Aniwat Kesorn<sup>e</sup>, Pimpa Limthongkul<sup>f</sup>, and Nonglak Meethong<sup>a,g,\*</sup>

<sup>a</sup>Institute of Nanomaterials Research and Innovation for Energy (IN-RIE), Research Network of NANOTEC- KKU (RNN), Khon Kaen University, Khon Kaen, 40002, Thailand.

<sup>b</sup>Synchrotron Light Research Institute, 111 University Avenue, Suranaree, Muang, Nakhon Ratchasima, 30000, Thailand.

<sup>c</sup>National Metal and Materials Technology Center (MTEC), National Science and Technology Development Agency, Pathumthani, 12120, Thailand.

<sup>d</sup>The Graduate School, Udon Thani Rajabhat University, Udon Thani, 41000, Thailand.

<sup>e</sup>Optical and Quantum Physics Laboratory, Department of Physics, Faculty of Science, Mahidol University, 10400, Thailand.

<sup>f</sup>National Energy Technology Center (ENTEC), National Science and Technology Development Agency, Pathumthani, 12120, Thailand.

<sup>g</sup>Materials Science and Nanotechnology Program, Department of Physics, Faculty of Science, Khon Kaen University, Khon Kaen, 40002, Thailand.

\*Corresponding authors: nonmee@kku.ac.th (NM)

## Crystal structure characterization

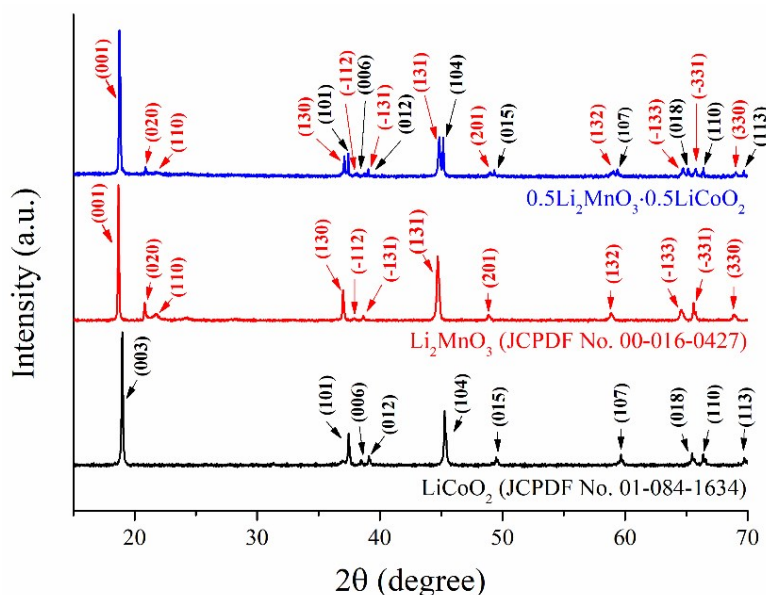

**Fig. S1** X-ray diffraction patterns of the 0.5Li<sub>2</sub>MnO<sub>3</sub>·0.5LiCoO<sub>2</sub>, Li<sub>2</sub>MnO<sub>3</sub>, and LiCoO<sub>2</sub> materials

The crystal structure of the prepared 0.5Li<sub>2</sub>MnO<sub>3</sub>·0.5LiCoO<sub>2</sub> material was investigated using X-ray diffraction (XRD) and the results shown in Fig. S1. The XRD results reveal that prepared sample could be identified as containing both monoclinic Li<sub>2</sub>MnO<sub>3</sub> and rhombohedral LiCoO<sub>2</sub> phases within the space groups of  $C2/m$  and  $R\bar{3}m$ , respectively. Additionally, weak diffraction peaks were detected in the 2θ range at around 20°-25°. This scenario takes place from the ordering of Li and Mn ions in the transition metal layers of the Li<sub>2</sub>MnO<sub>3</sub> component<sup>1-3</sup>. To achieve more detailed information about the structural properties of the prepared material, Rietveld refinements were done using both Li<sub>2</sub>MnO<sub>3</sub> and LiCoO<sub>2</sub> structural models as presented in Fig. S2. The refined lattice constants are demonstrated in Table S1. The obtained results reflect that the material had quite similar lattice constants with those of pure Li<sub>2</sub>MnO<sub>3</sub> and LiCoO<sub>2</sub> phases. Moreover, calculated weight fractions of Li<sub>2</sub>MnO<sub>3</sub> and LiCoO<sub>2</sub> phases were 54% and 46%, respectively, corresponding to the required chemical composition of the prepared 0.5Li<sub>2</sub>MnO<sub>3</sub>·0.5LiCoO<sub>2</sub> material. These results confirm that the prepared material is a composite material.

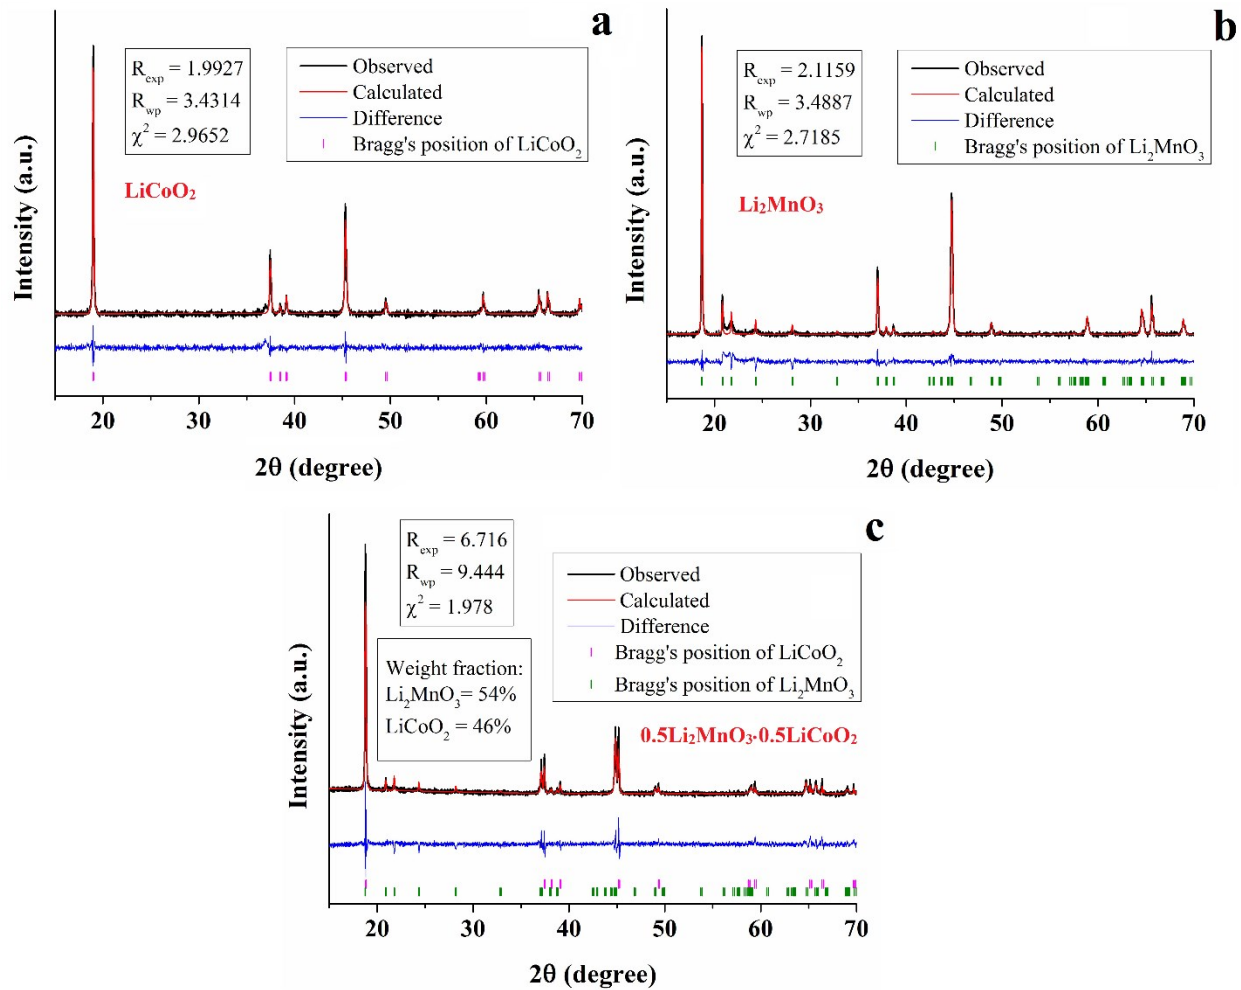

**Fig. S2** Rietveld refinement results of pristine LiCoO<sub>2</sub> (a), pristine Li<sub>2</sub>MnO<sub>3</sub> (b), and the synthesized 0.5Li<sub>2</sub>MnO<sub>3</sub>·0.5LiCoO<sub>2</sub> (c) materials

Table. S1 Comparisons of the calculated lattice constants of pristine LiCoO<sub>2</sub>, pristine Li<sub>2</sub>MnO<sub>3</sub>, and the synthesized 0.5Li<sub>2</sub>MnO<sub>3</sub>·0.5LiCoO<sub>2</sub> materials

| Samples                                                    | Lattice parameters                                  |                   |                   |                     |                                           |                                                                 |                    |                                           |
|------------------------------------------------------------|-----------------------------------------------------|-------------------|-------------------|---------------------|-------------------------------------------|-----------------------------------------------------------------|--------------------|-------------------------------------------|
|                                                            | Li <sub>2</sub> MnO <sub>3</sub> (C/2m) g = a = 90° |                   |                   |                     |                                           | LiCoO <sub>2</sub> ( R $\bar{3}$ m )<br>a = b= 90° and g = 120° |                    |                                           |
|                                                            | a (Å)                                               | B (Å)             | C (Å)             | b (Å)               | Unite cell<br>volume<br>(Å <sup>3</sup> ) | a and b<br>(Å)                                                  | c (Å)              | Unite cell<br>volume<br>(Å <sup>3</sup> ) |
| LiCoO <sub>2</sub>                                         | -                                                   | -                 | -                 | -                   |                                           | 2.8158<br>±0.0001                                               | 14.0523<br>±0.0009 | 96.4903                                   |
| Li <sub>2</sub> MnO <sub>3</sub>                           | 4.9262<br>±0.0002                                   | 8.5276<br>±0.0004 | 5.0236<br>±0.0002 | 109.1952<br>±0.0033 | 199.3000                                  | -                                                               | -                  | -                                         |
| 0.5Li <sub>2</sub> MnO <sub>3</sub> ·0.5LiCoO <sub>2</sub> | 4.9301<br>±0.0003                                   | 8.5099<br>±0.0005 | 5.0111<br>±0.0002 | 109.1829<br>±0.0045 | 198.2788                                  | 2.8138<br>±0.0001                                               | 14.1434<br>±0.0006 | 96.9764                                   |

## Local atomic structure characterization

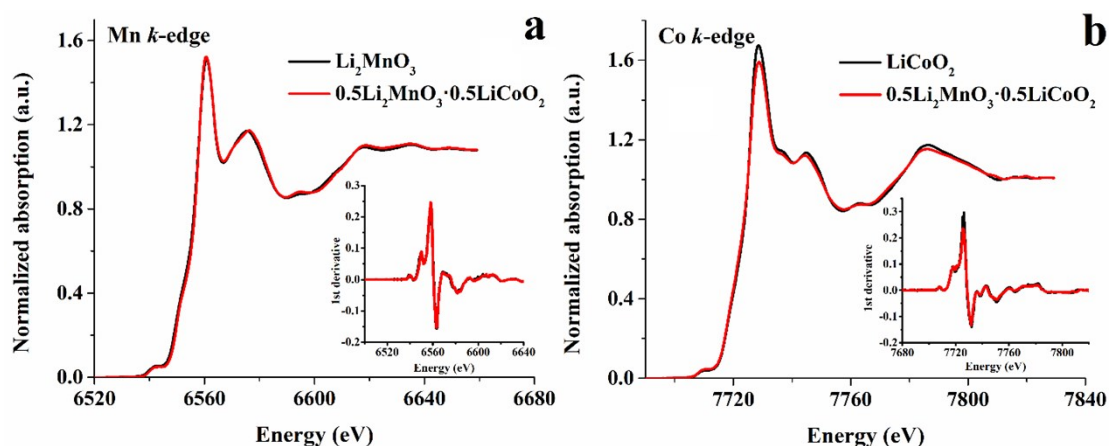

**Fig. S3** XANES profiles and the insets revealing the 1<sup>st</sup> derivative spectra at the Mn (a) and Co (b) K-edges of the  $0.5\text{Li}_2\text{MnO}_3 \cdot 0.5\text{LiCoO}_2$ ,  $\text{Li}_2\text{MnO}_3$ , and  $\text{LiCoO}_2$  materials

The local atomic structure of the prepared  $0.5\text{Li}_2\text{MnO}_3 \cdot 0.5\text{LiCoO}_2$  material was elucidated via X-ray absorption spectroscopy (XAS) as demonstrated in Fig. S3. In this experiment,  $\text{Li}_2\text{MnO}_3$  and  $\text{LiCoO}_2$  materials were used as standards. The XAS results reveal that the main absorption edge positions for the Mn and Co K-edges of the  $0.5\text{Li}_2\text{MnO}_3 \cdot 0.5\text{LiCoO}_2$ ,  $\text{Li}_2\text{MnO}_3$ , and  $\text{LiCoO}_2$  materials occur at the same position. This scenario is also ensured by the first derivatives of their XANES profiles, as illustrated in the insets of Figs. 3a and 3b. The results indicate that the valence states of the Mn and Co species in the  $0.5\text{Li}_2\text{MnO}_3 \cdot 0.5\text{LiCoO}_2$  sample are similar to those of pristine  $\text{Li}_2\text{MnO}_3$  and  $\text{LiCoO}_2$ . Moreover, the XANES profiles also correspond to those reported in previous works that revealed Mn and Co had valence states of 4+ and 3+, respectively<sup>4-6</sup>. Particularly, the prepared  $0.5\text{Li}_2\text{MnO}_3 \cdot 0.5\text{LiCoO}_2$  material provided nearly the same Mn and Co K-edge absorption spectra as those of pristine  $\text{Li}_2\text{MnO}_3$  and  $\text{LiCoO}_2$  materials, suggesting that  $0.5\text{Li}_2\text{MnO}_3 \cdot 0.5\text{LiCoO}_2$  had the same local atomic structure as those of pristine  $\text{Li}_2\text{MnO}_3$  and  $\text{LiCoO}_2$ . To obtain more detailed data regarding the local structural properties of the prepared material, EXAFS fittings were performed to calculate the bond lengths of Co-O, Mn-O, Co-TM, and Mn-TM in the synthesized material as presented in Fig. S4. It can be seen that the calculated bond lengths of Co-O and Co-TM in the prepared material are close to those of the pristine  $\text{LiCoO}_2$  structure for the Co K-edge. The calculated bond lengths of Mn-O and Mn-TM in the prepared material are similar to those of the pristine  $\text{Li}_2\text{MnO}_3$  structure Mn K-edge as shown in Table S2. From the experimental results, it can be confirmed that the prepared material is a composite cathode material, corroborated by the HRTEM and XRD results.

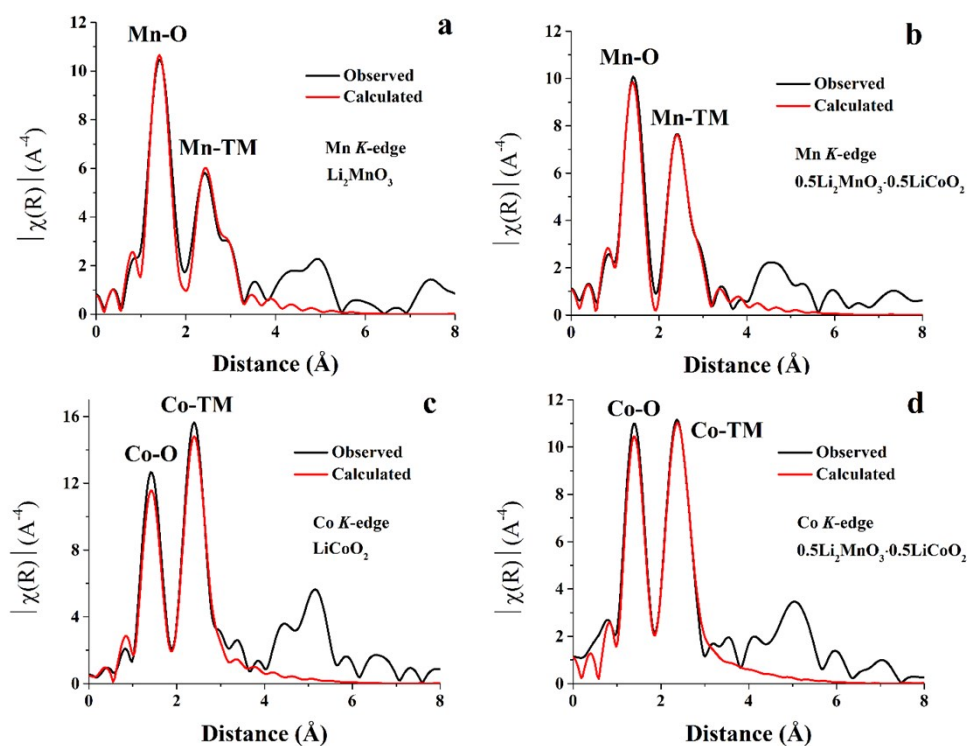

**Fig. S4** Mn (a and b) and Co (c and d) K-edges EXAFS fitting results of prepared  $0.5\text{Li}_2\text{MnO}_3 \cdot 0.5\text{LiCoO}_2$ ,  $\text{Li}_2\text{MnO}_3$ , and  $\text{LiCoO}_2$  materials

**Table S2.** The bond distances and agreement indices obtained from XAS spectra fitting of EXAFS spectra of pristine  $\text{LiCoO}_2$ , pristine  $\text{Li}_2\text{MnO}_3$ , and the synthesized  $0.5\text{Li}_2\text{MnO}_3 \cdot 0.5\text{LiCoO}_2$  materials

| Li <sub>2</sub> MnO <sub>3</sub> structure (Mn <i>K</i> -edge) |       |              |                 |                                  |              |                     |
|----------------------------------------------------------------|-------|--------------|-----------------|----------------------------------|--------------|---------------------|
| Sample                                                         | Shell | N<br>(atoms) | R (Å)           | σ <sup>2</sup> (Å <sup>2</sup> ) | R-<br>factor | E <sub>0</sub> (eV) |
| Li <sub>2</sub> MnO <sub>3</sub>                               | O     | 6            | 1.891<br>±0.012 | 0.002<br>±0.001                  | 0.018        | -4.017              |
|                                                                | Mn    | 3            | 2.844<br>±0.016 | 0.002<br>±0.001                  |              |                     |
| 0.5Li <sub>2</sub> MnO <sub>3</sub> -0.5LiCoO <sub>2</sub>     | O     | 6            | 1.891<br>±0.019 | 0.004<br>±0.001                  | 0.016        | -4.886              |
|                                                                | Mn    | 3            | 2.837<br>±0.017 | 0.002<br>±0.002                  |              |                     |
| LiCoO <sub>2</sub> structure (Co <i>K</i> -edge)               |       |              |                 |                                  |              |                     |
| Sample                                                         | Shell | N<br>(atoms) | R (Å)           | σ <sup>2</sup> (Å <sup>2</sup> ) | R-<br>factor | E <sub>0</sub> (eV) |
| LiCoO <sub>2</sub>                                             | O     | 6            | 1.907<br>±0.015 | 0.003<br>( set)                  | 0.020        | -4.505              |
|                                                                | Co    | 6            | 2.816<br>±0.017 | 0.004<br>( set)                  |              |                     |
| 0.5Li <sub>2</sub> MnO <sub>3</sub> -0.5LiCoO <sub>2</sub>     | O     | 6            | 1.911<br>±0.014 | 0.004<br>( set)                  | 0.008        | -4.488              |
|                                                                | Co    | 6            | 2.817<br>±0.013 | 0.004<br>( set)                  |              |                     |

## Electrochemical characterization

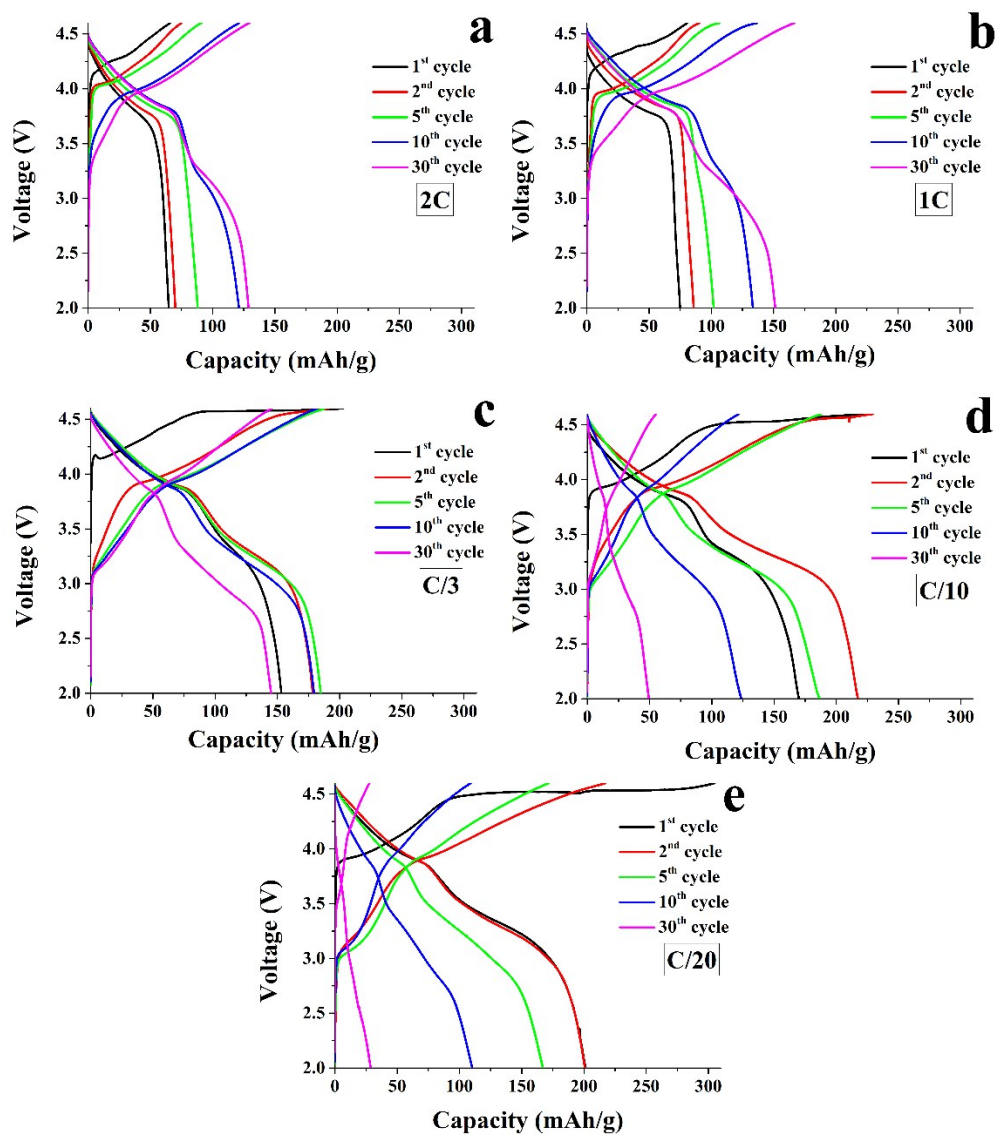

**Fig. S5** Voltage profiles of a  $0.5\text{Li}_2\text{MnO}_3 \cdot 0.5\text{LiCoO}_2$  sample cycled using various current rates of 2C (a), 1C (b), C/3 (c), C/10 (d), and C/20 (e) rates

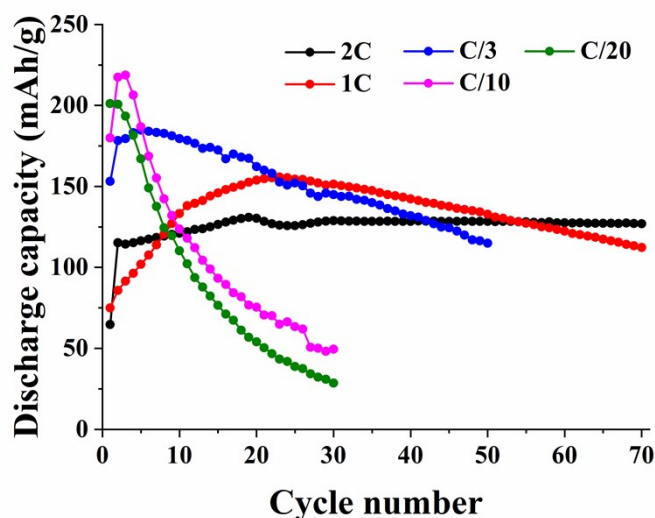

**Fig. S6** Cycling performance of a  $0.5\text{Li}_2\text{MnO}_3 \cdot 0.5\text{LiCoO}_2$  sample cycled at various current rates of 2C, 1C, C/3, C/10, and C/20

From these results, different cycling performance of electrodes cycled at various C-rates is apparent. In the case of cycling at slow rates (C/20, C/10, and C/3), most of the  $\text{Li}_2\text{MnO}_3$  component was activated after the first few charge-discharge cycles and subsequently induced a large degree of a spinel phase transition and structural degradation. This causes high capacity fading after the first few cycles. When the electrode was cycled at 1C, most of the  $\text{Li}_2\text{MnO}_3$  component is activated (a large activation) after about 20 cycles. During this progressive  $\text{Li}_2\text{MnO}_3$  activation, the capacity during the first 20 cycles continuously increases. After that, the capacity decreases significantly due to a large degree of a spinel phase transition and structural degradation. In the case of the electrode cycled at 2C, the  $\text{Li}_2\text{MnO}_3$  component was only slightly activated, leading to a small but gradually increased capacity.  $\text{Li}_2\text{MnO}_3$  activation and capacity increases continuously until most of the  $\text{Li}_2\text{MnO}_3$  phase is completely activated after a much greater number of cycles than electrodes cycled at slower rates, as presented in Fig. S6. The results reveal that the current rate significantly affects the degree of  $\text{Li}_2\text{MnO}_3$  activation during cycling, altering structural transition behaviors during electrochemical cycling and the electrochemical properties of the material.

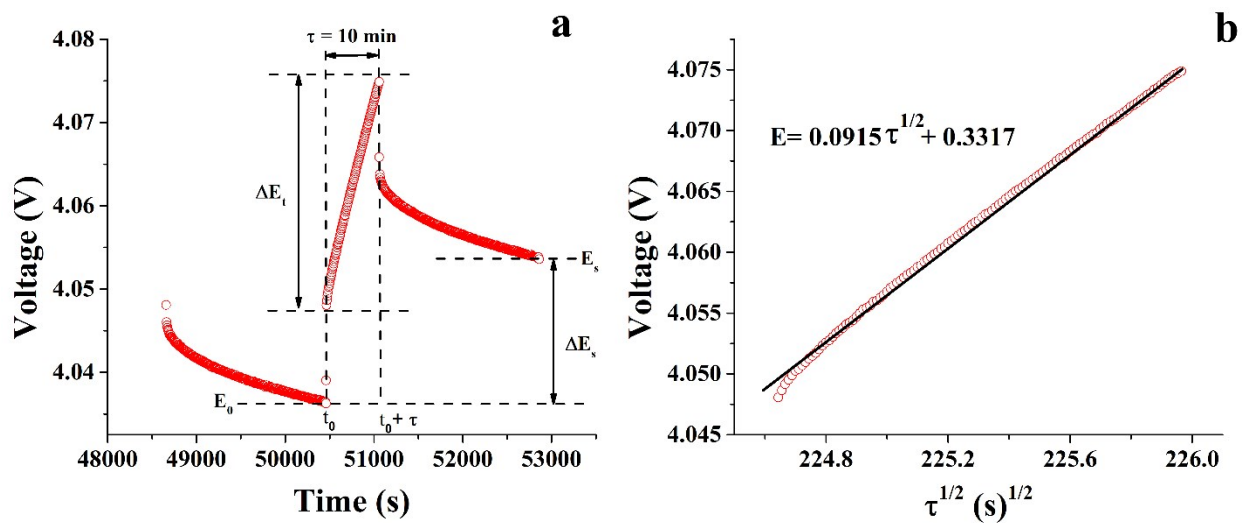

**Fig. S7** Single titration at about 4.05 V during GITT measurement (a) and the cell voltage as a function of  $t^{1/2}$  (b)

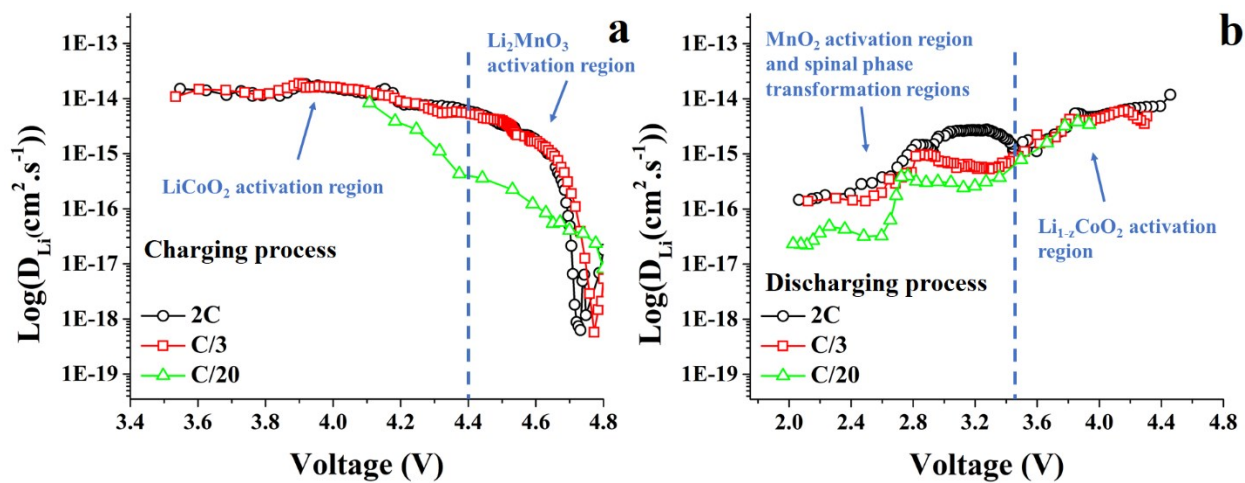

**Fig. S8** Calculated lithium ion diffusion coefficients as a function of cell voltage during charging (a) and discharging (b) of the  $0.5\text{Li}_2\text{MnO}_3 \cdot 0.5\text{LiCoO}_2$  materials cycled at 2C, 1C, and C/20 rates after 30 cycles

**Table. S3** Comparison of calculated resistances obtained from fitting parameters using the equivalent circuit model illustrated in Fig. S9 of the fresh cell and the cells cycled at various current rates after 30 cycles

| Sample     | $R_w$ (W) | $R_{CT}$ (W) |
|------------|-----------|--------------|
| Fresh cell | 0.428     | 38.60        |
| 2C         | 0.521     | 75.83        |
| C/3        | 0.515     | 83.33        |
| C/20       | 0.530     | 168.42       |

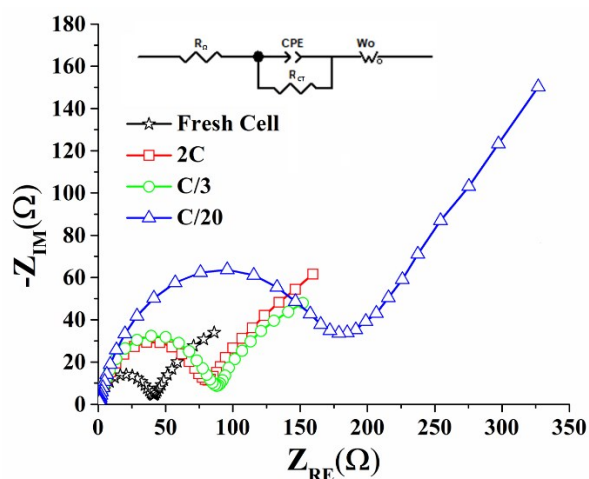

**Fig. S9** Nyquist plots of the fresh cell and the cells cycled at 2C, 1C, and C/20 after cycling for 30 cycles and the inset shows an equivalent circuit.  $R_w$ ,  $R_{CT}$ , CPE, and  $W_o$  denote the ohmic resistance, the charge transfer resistance, constant phase element, and Warburg resistance, respectively.

## References

1. J. Bréger, M. Jiang, N. Dupré, Y. S. Meng, Y. Shao-Horn, G. Ceder and C. P. Grey, *Journal of Solid State Chemistry*, 2005, **178**, 2575-2585.
2. F. Amalraj, D. Kovacheva, M. Talianker, L. Zeiri, J. Grinblat, N. Leifer, G. Goobes, B. Markovsky and D. Aurbach, *Journal of The Electrochemical Society*, 2010, **157**, A1121.
3. W. C. West, J. Soler and B. V. Ratnakumar, *Journal of Power Sources*, 2012, **204**, 200-204.
4. B. R. Long, J. R. Croy, F. Dogan, M. R. Suchomel, B. Key, J. Wen, D. J. Miller, M. M. Thackeray and M. Balasubramanian, *Chemistry of Materials*, 2014, **26**, 3565-3572.
5. J. Bareño, M. Balasubramanian, S. H. Kang, J. G. Wen, C. H. Lei, S. V. Pol, I. Petrov and D. P. Abraham, *Chemistry of Materials*, 2011, **23**, 2039-2050.
6. J. R. Croy, M. Balasubramanian, D. Kim, S.-H. Kang and M. M. Thackeray, *Chemistry of Materials*, 2011, **23**, 5415-5424.
